# Supplementary material for: Understanding Antenatal Care Service Quality for Malaria in Pregnancy through Supportive Supervision Data in Tanzania
Source: PubMed Central journal article supplement (PMC10919228; doi:10.4269/ajtmh.23-0399), 2024-02-06
Supplement: tpmd230399.SD1.pdf [file tpmd230399.SD1.pdf]

Table S1. Client sampling for client satisfaction survey

|           |                                      | Round 1<br>(2021) | Round 2<br>(2022) | Total<br>Clients<br>Surveyed |
|-----------|--------------------------------------|-------------------|-------------------|------------------------------|
| 0 clients | Dispensary                           | 198               | 212               | 0                            |
|           | Health Center                        | 21                | 15                | 0                            |
|           | Hospital                             | 6                 | 2                 | 0                            |
|           | <b>Total</b>                         | <b>225</b>        | <b>229</b>        | <b>0</b>                     |
| 1 client  | Dispensary                           | 55                | 56                | 111                          |
|           | Health Center                        | 10                | 14                | 24                           |
|           | Hospital                             | 0                 | 2                 | 1                            |
|           | <b>Total</b>                         | <b>65</b>         | <b>72</b>         | <b>137</b>                   |
| 2 clients | Dispensary                           | 164               | 170               | 668                          |
|           | Health Center                        | 30                | 15                | 90                           |
|           | Hospital                             | 8                 | 5                 | 26                           |
|           | <b>Total</b>                         | <b>202</b>        | <b>190</b>        | <b>784</b>                   |
| 3 clients | Dispensary                           | 0                 | 1                 | 3                            |
|           | Health Center                        | 0                 | 8                 | 24                           |
|           | Hospital                             | 0                 | 1                 | 3                            |
|           | <b>Total</b>                         | <b>0</b>          | <b>10</b>         | <b>30</b>                    |
| 4 clients | Dispensary                           | 0                 | 1                 | 4                            |
|           | Health Center                        | 0                 | 14                | 56                           |
|           | Hospital                             | 0                 | 6                 | 24                           |
|           | <b>Total</b>                         | <b>0</b>          | <b>21</b>         | <b>84</b>                    |
| Totals    | <b>Total discrete facilities</b>     | <b>492</b>        | <b>522</b>        |                              |
|           | <b>Total facilities with clients</b> | <b>267</b>        | <b>293</b>        |                              |
|           | <b>Total clients surveyed</b>        | <b>469</b>        | <b>566</b>        | <b>1035</b>                  |

**Table S2. Association of health facility type with coverage of Malaria in Pregnancy care components (regression results)**

| Health facility type | Malaria in Pregnancy Care Component Coverage*   |                                                 |                               |                               |                                             |                                             |                                              |
|----------------------|-------------------------------------------------|-------------------------------------------------|-------------------------------|-------------------------------|---------------------------------------------|---------------------------------------------|----------------------------------------------|
|                      | OR [CI]<br>p-value                              |                                                 |                               |                               |                                             |                                             |                                              |
|                      | ITN provision                                   | Hb test recorded                                | mRDT result                   | Hematinic provision           | GA recorded                                 | Any IPTp                                    | IPTp3+                                       |
| Dispensary           | REF                                             | REF                                             | REF                           | REF                           | REF                                         | REF                                         | REF                                          |
| Health Center        | <b>0.43</b><br>[0.32-0.57]<br><b>p&lt;0.001</b> | <b>1.24</b><br>[1.11-1.30]<br><b>p&lt;0.001</b> | 0.87<br>[0.67-1.10]<br>p=0.27 | 1.03<br>[0.83-1.27]<br>p=0.79 | <b>0.80</b><br>[0.64-0.99]<br><b>p=0.04</b> | <b>1.16</b><br>[1.01-1.32]<br><b>p=0.03</b> | 0.90<br>[0.80-1.00]<br>p=0.06                |
| Hospital             | 0.82<br>[0.43-1.57]<br>p=0.15                   | <b>1.54</b><br>[1.25-1.90]<br><b>p&lt;0.001</b> | 0.72<br>[0.43-1.10]<br>p=0.20 | 0.74<br>[0.53-1.05]<br>p=0.08 | <b>0.64</b><br>[0.44-0.91]<br><b>p=0.01</b> | 0.82<br>[0.63-1.06]<br>p=0.13               | <b>1.34</b><br>[1.08-1.67]<br><b>p=0.007</b> |

Regression analyses include all client records where facility was specified (N=11,256). ITN: insecticide-treated net; Hb: hemoglobin; mRDT: malaria rapid diagnostic test; GA: gestational age; IPTp: intermittent preventive treatment in pregnancy

**Table S3. Association of health facility type with receipt of total number of IPTp doses  
(regression results)**

| Health facility type | Total number of IPTp doses received*                |                               |                                                        |
|----------------------|-----------------------------------------------------|-------------------------------|--------------------------------------------------------|
|                      | OR [CI]<br>p-value                                  |                               |                                                        |
|                      | 1                                                   | 2                             | 3+                                                     |
| Dispensary           | REF                                                 | REF                           | REF                                                    |
| Health Center        | <b>1.16</b><br><b>[1.02-1.33]</b><br><b>p=0.025</b> | 1.0<br>[0.87-1.15]<br>p=0.99  | 0.90<br>[0.80-1.00]<br>p=0.059                         |
| Hospital             | 0.82<br>[0.63-1.07]<br>p=0.15                       | 0.78<br>[0.59-1.02]<br>p=0.07 | <b>1.34</b><br><b>[1.08-1.67]</b><br><b>p=0.007</b>    |
| Unspecified          | <b>0.11</b><br><b>[0.02-0.84]</b><br><b>p=0.033</b> | N/A**                         | <b>23.13</b><br><b>[3.16-169.52]</b><br><b>p=0.002</b> |

\* Each of the 3 regressions in this table was performed on the subset of women documented as receiving that total number of doses of IPTp. Women who received zero doses (N=2,291) were not included. IPTp: intermittent preventive treatment in pregnancy; \*\*Could not be computed due to small sample size
